# Supplementary material for: The combination of positive anti‑WDR1 antibodies with negative anti‑CFL1 antibodies in serum is a poor prognostic factor for patients with esophageal carcinoma
Source: PubMed Central journal article supplement (PMC9983066; doi:10.3892/mi.2023.71), 2023-01-31
Supplement: Supplementary_Data2.pdf [file Supplementary_Data2.pdf]

**Table SI. Comparison of the s-WDR1-Ab and s-CFL1-Ab levels in healthy donors vs. those in 192 patients with esophageal carcinoma.**

| Results of statistical analysis | s-WDR1-Ab   | s-CFL1-Ab   |
|---------------------------------|-------------|-------------|
| AUC                             | 0.648       | 0.694       |
| 95% CI                          | 0.590-0.703 | 0.636-0.747 |
| P-value                         | <0.001      | <0.001      |
| Cut-off value (Youden index)    | 1865        | 50718       |
| Sensitivity (%)                 | 59.90       | 53.3        |
| Specificity (%)                 | 67.71       | 68.8        |

WDR1, WD repeat-containing protein 1; s-WDR1-Ab, serum anti-WDR1 antibody; CFL1, cofilin 1; s-CFL1-Ab, serum anti-CFL1 antibody; AUC, area under the curve; 95% CI, 95% confidence interval.
